# Supplementary material
Source: publisher site journal article supplement (https://www.dovepress.com/article/448090)
Supplement: Supplementary file 1 [file get_supplementary_file.php]

**Supplementary Information**

**Table S1.** Baseline characteristics of the participants (n=18)

**Table S2.** Summary of plasma escitalopram PK parameters by treatment after single dosing

**Table S3.** Summary of adverse events and details stratified by severity, relationship to study drug, and system organ class.

**Table S1**. Baseline characteristics of the subjects (n=18)

| Variables | Group 1 (n=9) | Group 2 (n=9) | Total (n=18) |
| --- | --- | --- | --- |
| Age, year | 28.00±6.16 | 27.11±4.14 | 27.56±5.11 |
| Weight, kg | 70.72±8.98 | 69.48±8.66 | 70.10±8.58 |
| Height, cm | 172.78±5.50 | 173.53±5.17 | 173.16±5.20 |
| Body mass index, kg/m2 | 23.69±2.59 | 23.08±2.64 | 23.38±2.55 |
| CYP2C19 polymorphism, n |  |  |  |
| EM | 4 | 5 | 9 |
| IM | 4 | 4 | 8 |
| PM | 1 | 0 | 1 |

**Table S2.** Summary of plasma escitalopram PK parameters by treatment after single dosing

| Parameters | Group 1 | | |  | Group 2 | | |
| --- | --- | --- | --- | --- | --- | --- | --- |
| E (n=9) | E+A1 (n=9) | E+A2 (n=7) |  | E (n=9) | E+A3 (n=9) | E+A4 (n=9) |
| (h) | 3.0 (2.0–5.0) | 2.0 (2.0–4.0) | 2.0 (2.0–4.0) |  | 2.0 (2.0–5.0) | 3.0 (2.0–5.0) | 3.0 (2.0–4.0) |
| (h) | 30.2±11.0 | 22.7±5.3 | 30.3±20.9 |  | 25.1±7.4 | 20.0±4.3 | 21.2±5.7 |
| (ng/mL) | 12.6±1.4 | 14.4±1.9 | 12.9±2.1 |  | 13.7±3.3 | 12.8±3.5 | 13.3±3.0 |
| (h∙ng/mL) | 180.5±24.8 | 189.3±39.1 | 181.2±39.5 |  | 175.7±41.5 | 175.9±40.5 | 179.1±41.2 |
| (h∙ng/mL) | 359.5±115.3 | – | – |  | 315.4±121.1 | – | – |
| (h∙ng/mL) | 439.8/±175.5 | – | – |  | 364.7±138.0 | – | – |
| (L) | 1009.5±107.4 | – | – |  | 1040.9±194.5 | – | – |
| (L/h) | 25.5±8.5 | – | – |  | 31.8±13.8 | – | – |

**Notes:** All data are expressed as mean±standard deviation except median (min–max).

**Abbreviations:** E, a 10 mg tablet of escitalopram orally once in fasting; E+A1, a 10 mg tablet of escitalopram orally once daily with Gami-soyosan one packet three times per day for 7 days; E+A2, a 10 mg tablet of escitalopram orally once daily with Banhasasim-tang one packet three times per day for 7 days; E+A3, a 10 mg tablet of escitalopram orally once daily with Ojeok-san one packet three times per day for 7 days; E+A4, a 10 mg tablet of escitalopram orally once daily with Bojungikgi-tang one packet three times per day for 7 days., the time when maximum plasma concentration reaches; , the half-life; , maximum plasma concentration; , area under the plasma drug concentration-time curve over a dosing interval; , area under the plasma drug concentration-time curve until the last time after dosing; , area under the plasma drug concentration-time curve after dosing extrapolated to infinite time; , the apparent volume of distribution; , the apparent clearance.

**Table S3.** Summary of treatment emergent adverse events

|  | Number of Subjects (Number of adverse events) | | | | | |
| --- | --- | --- | --- | --- | --- | --- |
| E  (N=18) | E+A1  (N=9) | E+A2  (N=9) | E+A3  (N=9) | E+A4  (N=9) | Total  (N=18) |
| Systems Organ Class (all adverse events) | 5 (5) | 1 (1) | 2 (2) | 5 (8) | 4 (5) | 9 (21) |
| **Gastrointestinal disorders** | 2 (2] | - | 1 (1) | 3 (3) | 1 (1) | 5 (7) |
| Nausea | 2 (2) | - | - | 2 (2) | 1 (1) | 3 (5) |
| Abdominal pain upper | - | - | - | 1 (1) | - | 1 (1) |
| Diarrhea | - | - | 1 (1) | - | - | 1 (1) |
| **Skin and subcutaneous tissue disorders** | - | - | - | 2 (2) | 2 (2) | 3 (4) |
| Drug eruption | - | - | - | 1 (1) | 1 (1) | 2 (2) |
| Dermatitis | - | - | - | 1 (1) | 1 (1) | 1 (2) |
| **Hepatobiliary disorders** | - | 1 (1) | - | - | 1 (1) | 2 (2) |
| Hepatitis acute | - | 1 (1) | - | - | 1 (1) | 2 (2) |
| **Renal and urinary disorders** | 2 (2) | - | 1 (1) | - | - | 2 (3) |
| Hematuria | 2 (2) | - | 1 (1) | - | - | 2 (3) |
| **Infections and infestations** | - | - | - | 1 (1) | - | 1 (1) |
| Conjunctivitis | - | - | - | 1 (1) | - | 1 (1) |
| **Metabolism and nutrition disorders** | 1 (1) | - | - | - | - | 1 (1) |
| Hyponatremia | 1 (1) | - | - | - | - | 1 (1) |
| **Nervous system disorders** | - | - | - | 1 (2) | 1 (1) | 1 (3) |
| Dizziness | - | - | - | 1 (1) | - | 1 (1) |
| Headache | - | - | - | 1 (1) | 1 (1) | 1 (2) |

**Abbreviations:** E, a 10 mg tablet of escitalopram orally once in fasting; E+A1, a 10 mg tablet of escitalopram orally once daily with Gami-soyosan one packet three times per day for 7 days; E+A2, a 10 mg tablet of escitalopram orally once daily with Banhasasim-tang one packet three times per day for 7 days; E+A3, a 10 mg tablet of escitalopram orally once daily with Ojeok-san one packet three times per day for 7 days; E+A4, a 10 mg tablet of escitalopram orally once daily with Bojungikgi-tang one packet three times per day for 7 days.
